# Supplementary material for: Factors associated with reporting of the Prevention of Falls Network Europe (ProFaNE) core outcome set domains in randomized trials on falls in older people: a citation analysis and correlational study
Source: PubMed Central journal article supplement (PMC9419335; doi:10.1186/s13063-022-06642-w), 2022-08-26

Appendix figure 3: Fitted model with classification statistics for response variable Fall reported.

| Fit Statistics   |          |        |           |             |             |         |        |        |        |
|------------------|----------|--------|-----------|-------------|-------------|---------|--------|--------|--------|
|                  | N Leaves | ASE    | Mis-class | Sensitivity | Specificity | Entropy | Gini   | RSS    | AUC    |
| Model Based      | 10       | 0.0149 | 0.0238    | 0.9733      | 1.0000      | 0.0624  | 0.0298 | 2.5000 | 0.9956 |
| Cross Validation | 10       | 0.1546 | 0.1522    | 0.9067      | 0.2222      |         |        |        |        |

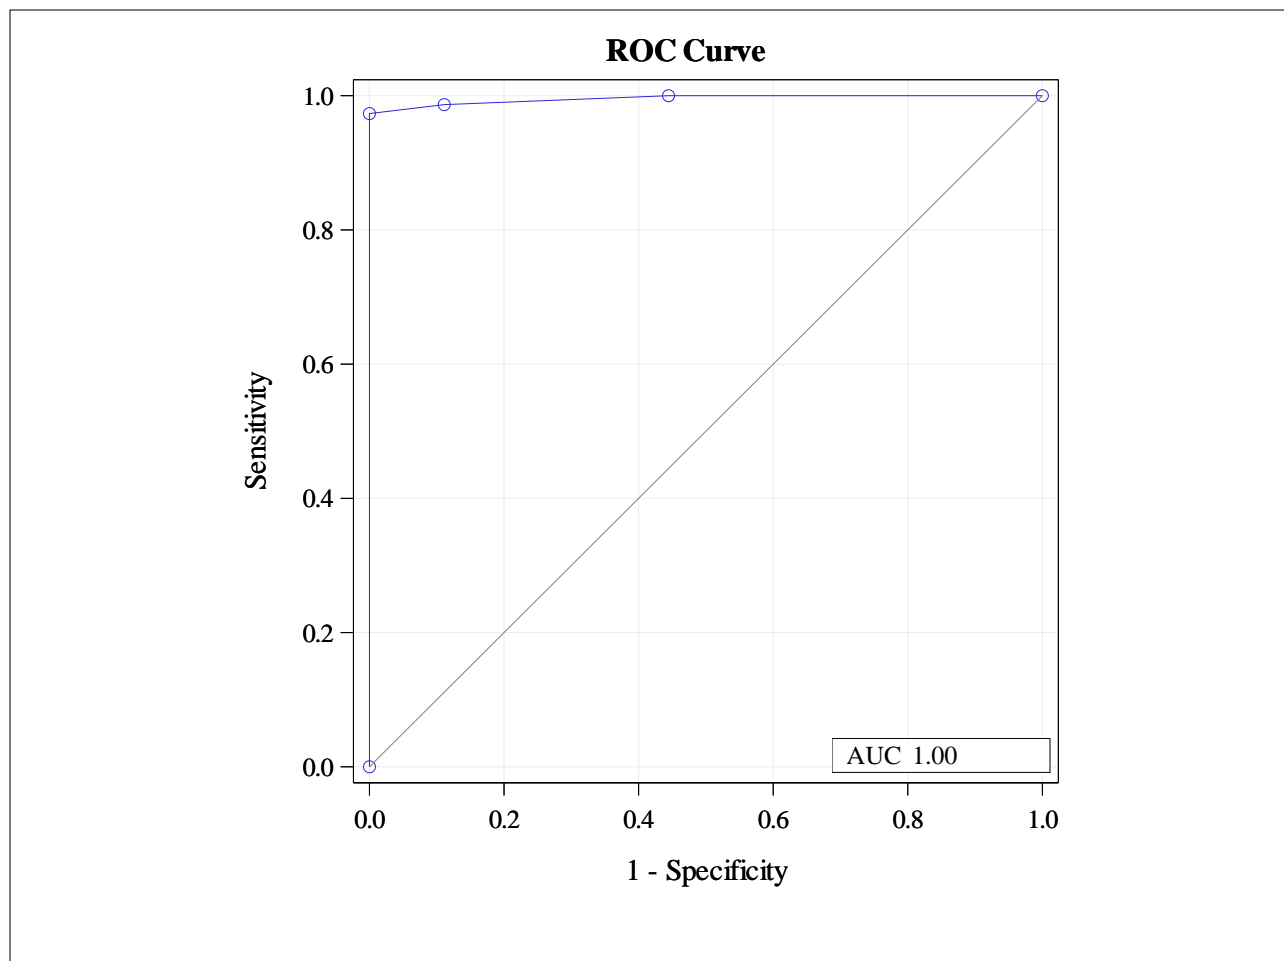

Appendixfigure 4: Fitted model with classification statistics for response variable Injuries reported.

| Fit Statistics          |          |        |           |             |             |         |        |         |        |
|-------------------------|----------|--------|-----------|-------------|-------------|---------|--------|---------|--------|
|                         | N Leaves | ASE    | Mis-class | Sensitivity | Specificity | Entropy | Gini   | RSS     | AUC    |
| <b>Model Based</b>      | 10       | 0.0912 | 0.1429    | 0.8511      | 0.8649      | 0.4045  | 0.1824 | 15.3183 | 0.9416 |
| <b>Cross Validation</b> | 10       | 0.2694 | 0.3359    | 0.6596      | 0.7027      |         |        |         |        |

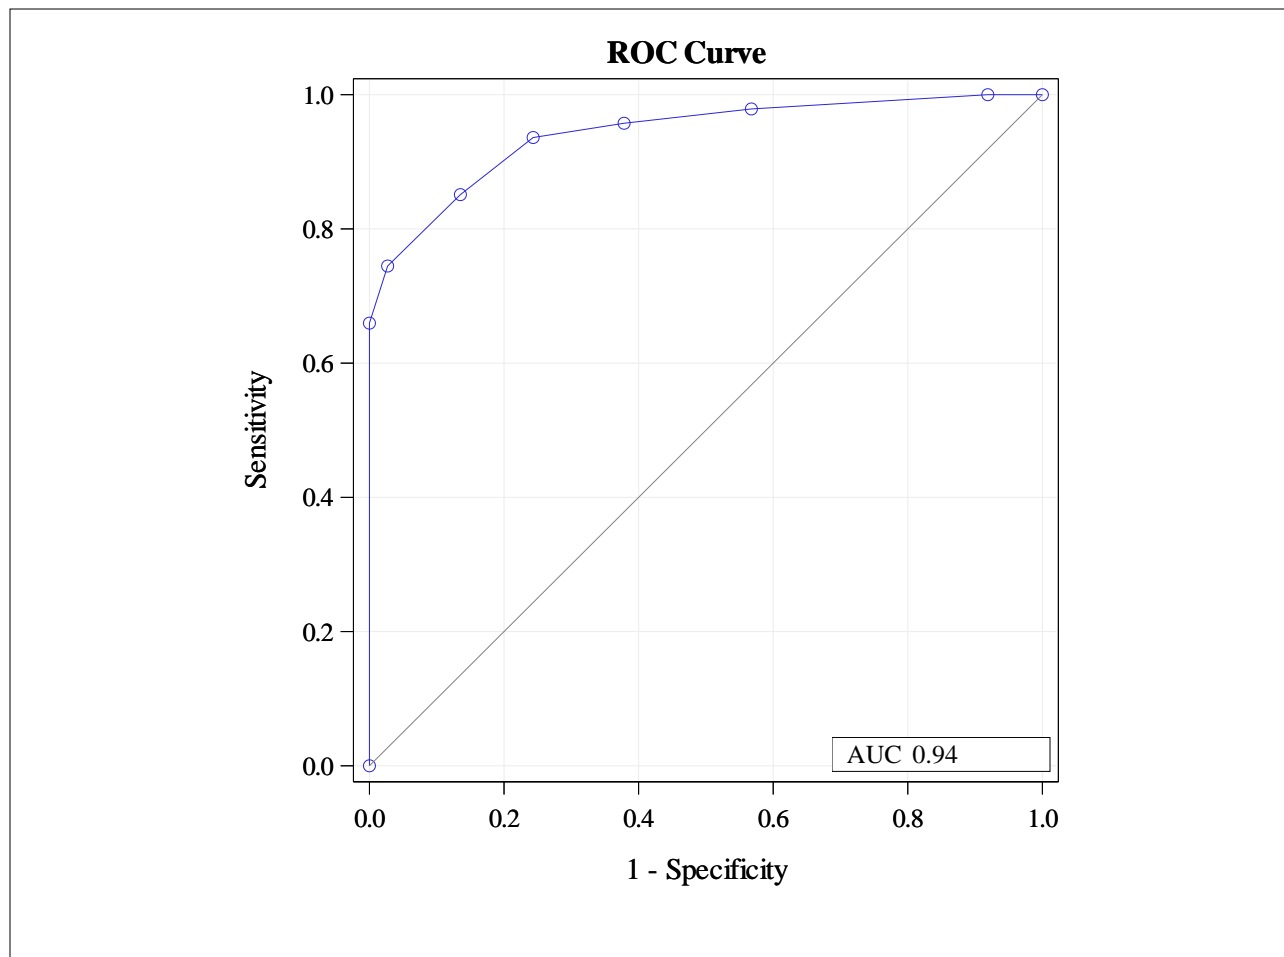

Appendix figure 5: Fitted model with classification statistics for response variable Psychological Consequences of falling reported.

| Fit Statistics          |          |        |           |             |             |         |        |         |        |
|-------------------------|----------|--------|-----------|-------------|-------------|---------|--------|---------|--------|
|                         | N Leaves | ASE    | Mis-class | Sensitivity | Specificity | Entropy | Gini   | RSS     | AUC    |
| <b>Model Based</b>      | 10       | 0.1223 | 0.1667    | 0.9211      | 0.7609      | 0.5403  | 0.2447 | 20.5516 | 0.8890 |
| <b>Cross Validation</b> | 10       | 0.3824 | 0.4675    | 0.4474      | 0.6304      |         |        |         |        |

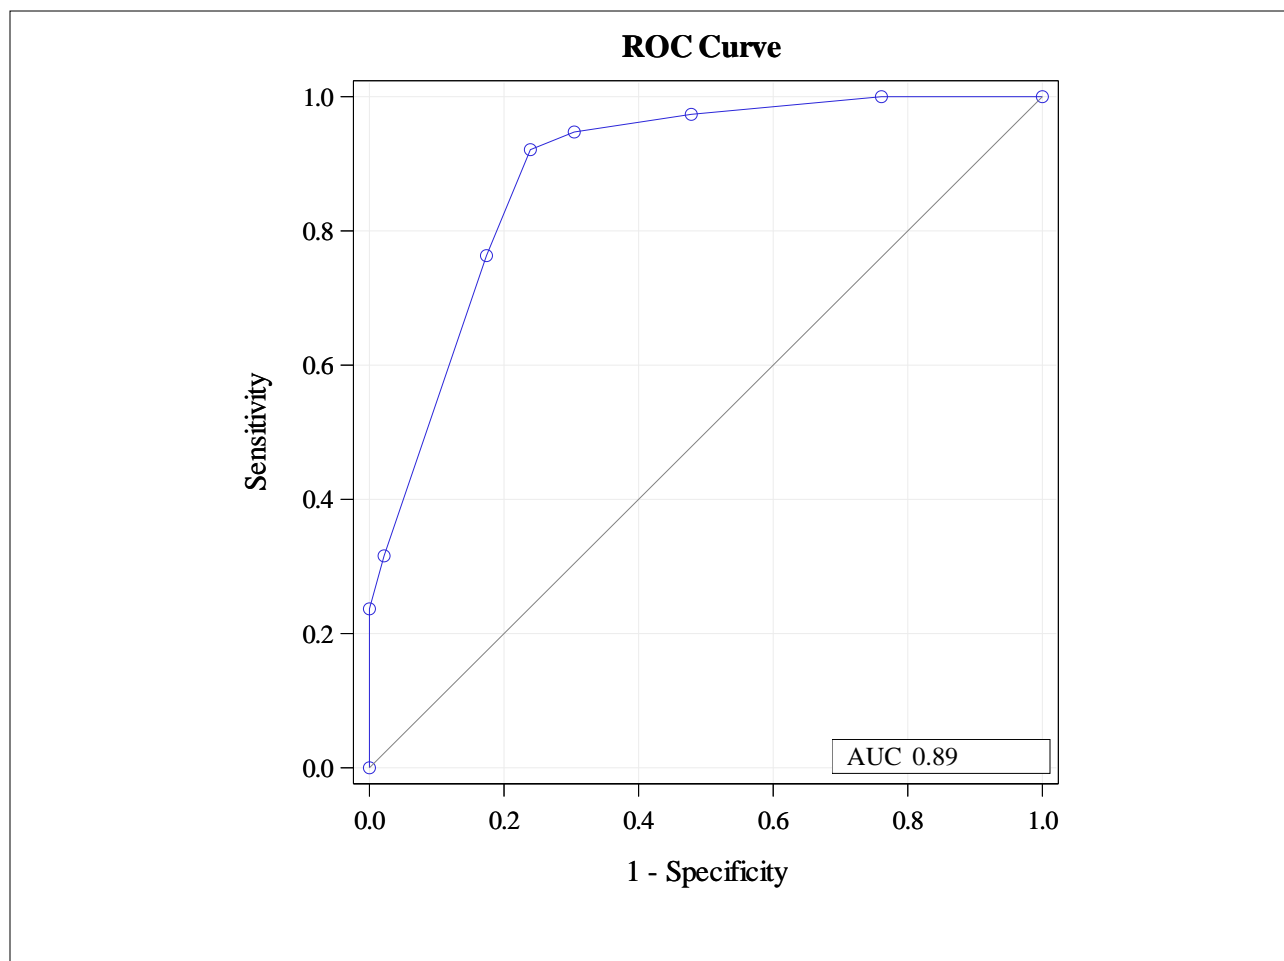

Appendix figure 6: Fitted model with classification statistics for response variable QOL reported.

| Fit Statistics          |          |        |           |             |             |         |        |         |        |
|-------------------------|----------|--------|-----------|-------------|-------------|---------|--------|---------|--------|
|                         | N Leaves | ASE    | Mis-class | Sensitivity | Specificity | Entropy | Gini   | RSS     | AUC    |
| <b>Model Based</b>      | 10       | 0.1268 | 0.1667    | 0.5862      | 0.9636      | 0.5665  | 0.2536 | 21.2987 | 0.8533 |
| <b>Cross Validation</b> | 10       | 0.3540 | 0.4740    | 0.2759      | 0.6545      |         |        |         |        |

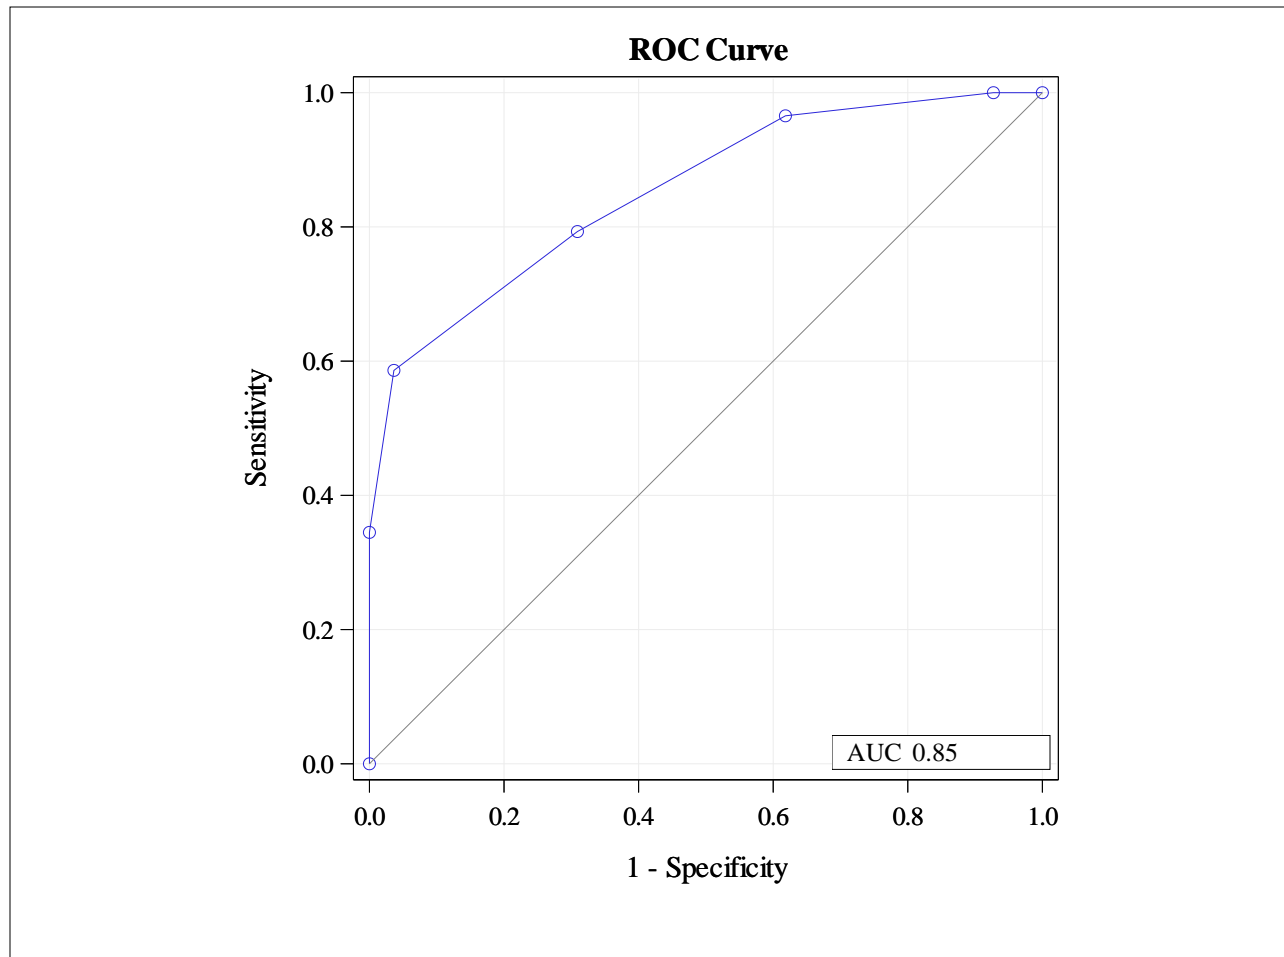

Appendix figure 7: Fitted model with classification statistics for response variable Physical Activity reported.

| Fit Statistics   |          |        |           |             |             |         |      |     |        |
|------------------|----------|--------|-----------|-------------|-------------|---------|------|-----|--------|
|                  | N Leaves | ASE    | Mis-class | Sensitivity | Specificity | Entropy | Gini | RSS | AUC    |
| Model Based      | 20       | 0      | 0.0000    | 1.0000      | 1.0000      | 0       | 0    | 0   | 1.0000 |
| Cross Validation | 19       | 0.4848 | 0.4867    | 0.4839      | 0.5283      |         |      |     |        |

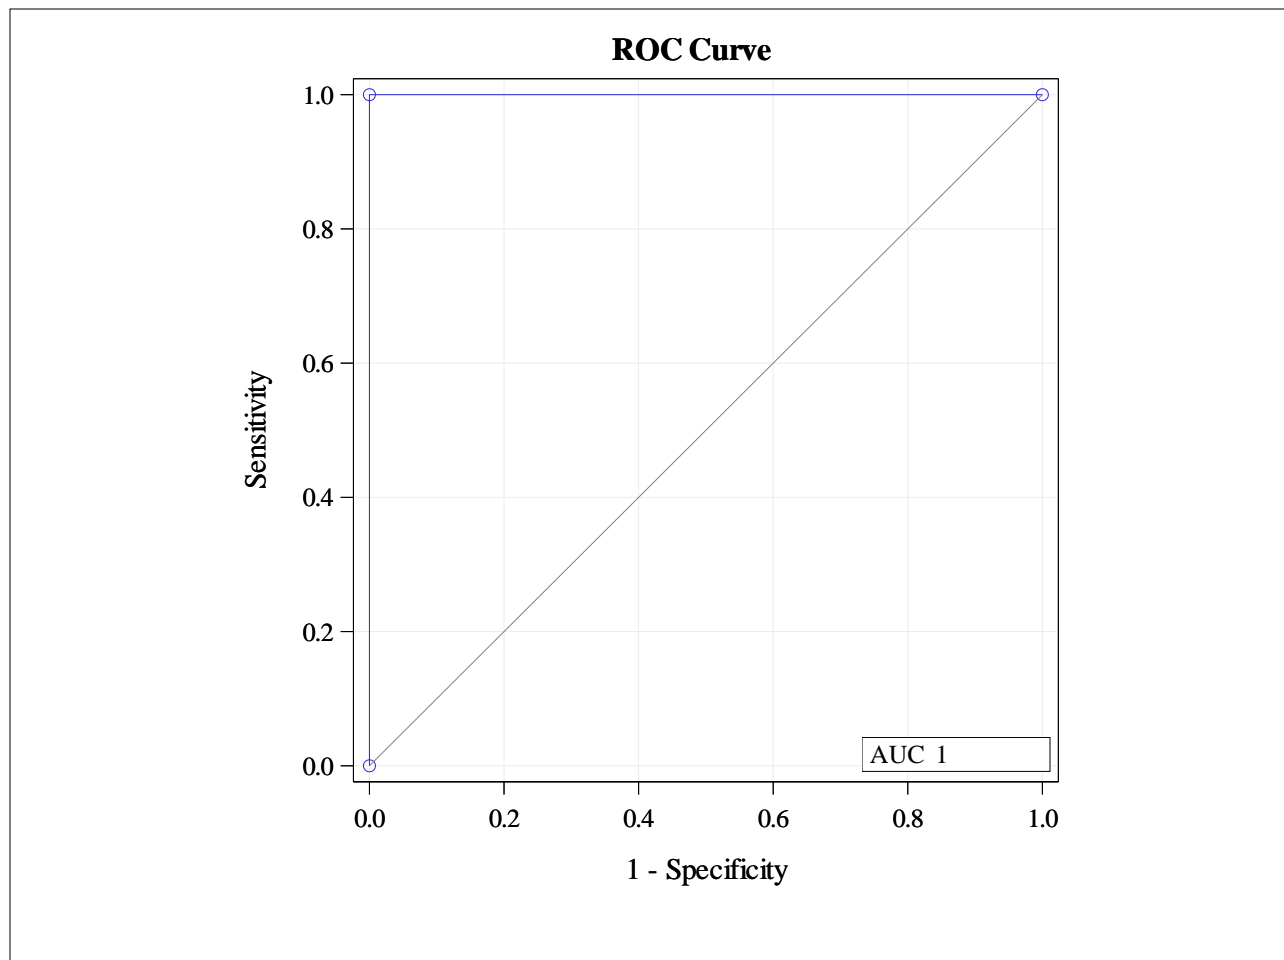

Supplement: 13063_2022_6642_MOESM2_ESM.pdf [file 13063_2022_6642_MOESM2_ESM.pdf]
