# Supplementary material for: Factors associated with reporting of the Prevention of Falls Network Europe (ProFaNE) core outcome set domains in randomized trials on falls in older people: a citation analysis and correlational study
Source: PubMed Central journal article supplement (PMC9419335; doi:10.1186/s13063-022-06642-w), 2022-08-26

Appendix Figure 1: Best model fit criterion has been met for most of the criterion.

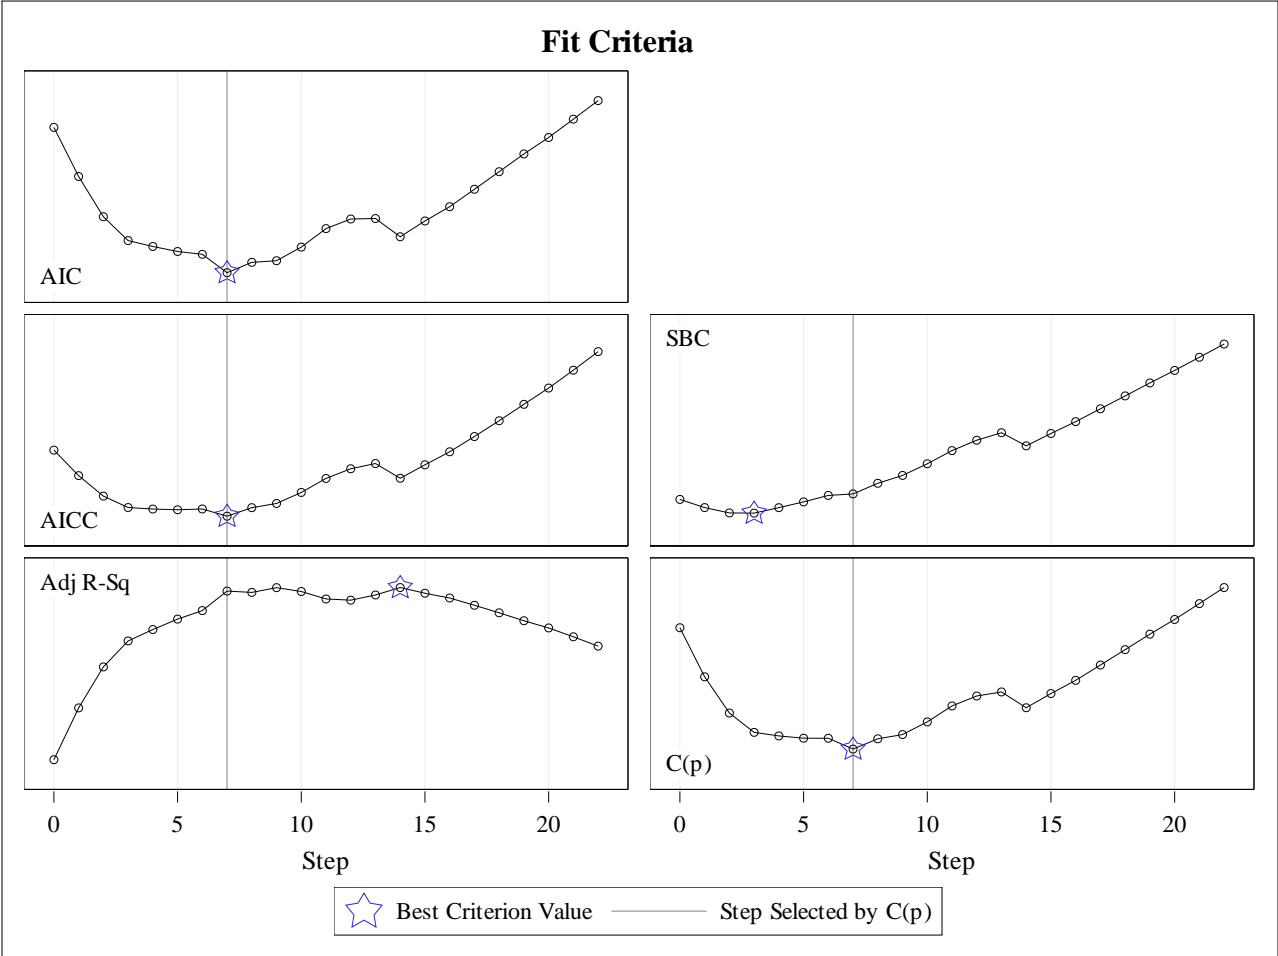

Appendix Figure 2: Average squared error was minimum at chosen step.

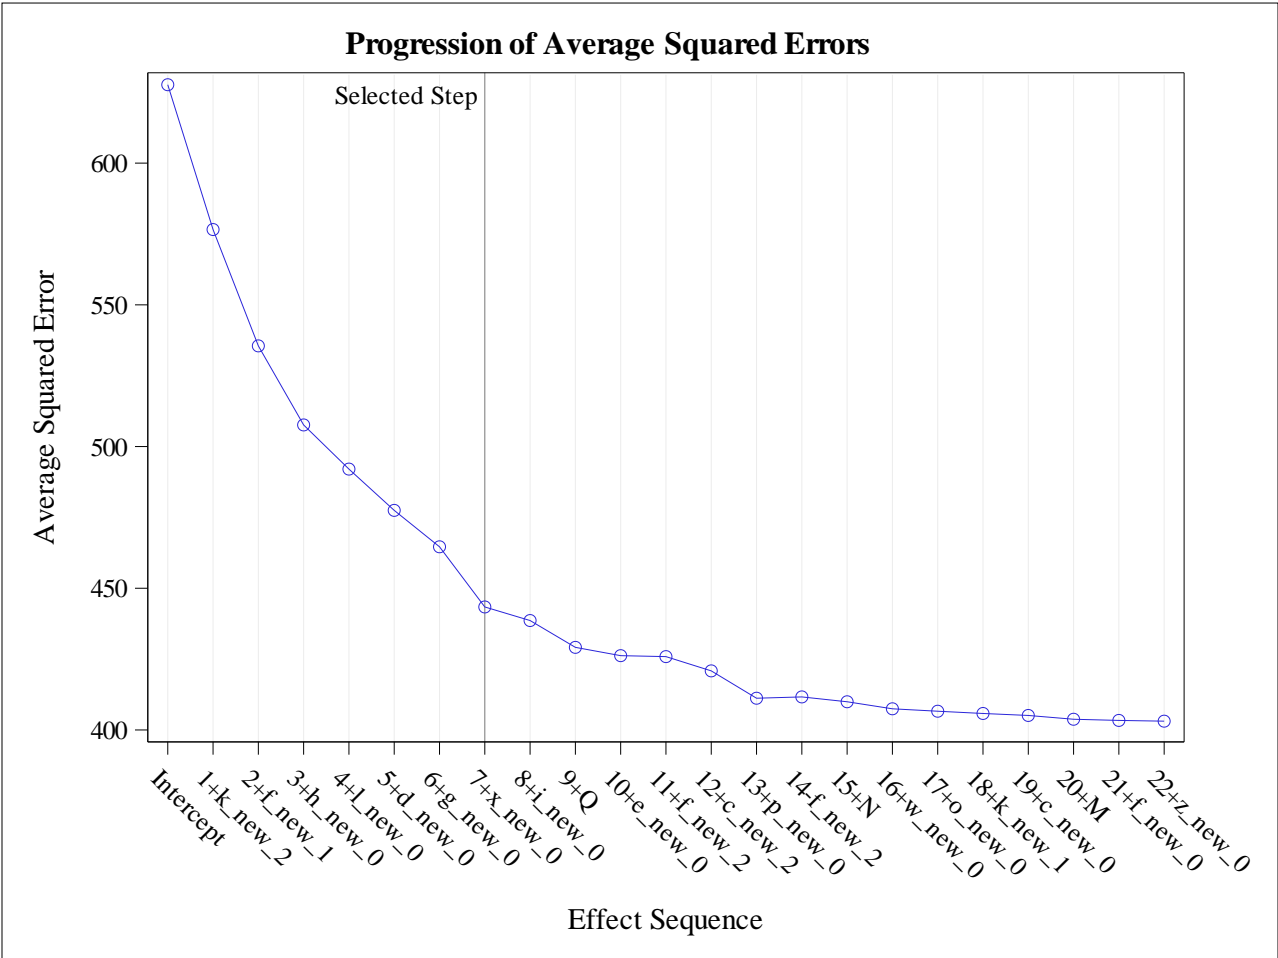

Supplement: 13063_2022_6642_MOESM1_ESM.pdf [file 13063_2022_6642_MOESM1_ESM.pdf]
